# Supplementary material
Source: publisher site journal article supplement (https://www.dovepress.com/article/466258)
Supplement: Supplementary file 1 [file get_supplementary_file.php]

**Supplementary Material**

**Analysis of Biodistribution and In Vivo Toxicity of**

**Varying Sized Polystyrene Micro and Nanoplastics in Mice**

Bohai Du, Tianlan Li, Haoqi He, Xun Xu, Chunmei Zhang, Xianzhu Lu, Yuhan Wang, Jingyi Cao, Yinghan Lu, Yiwa Liu, Shanshan Hu, Juxiao Li, Li Li, Ming Shi


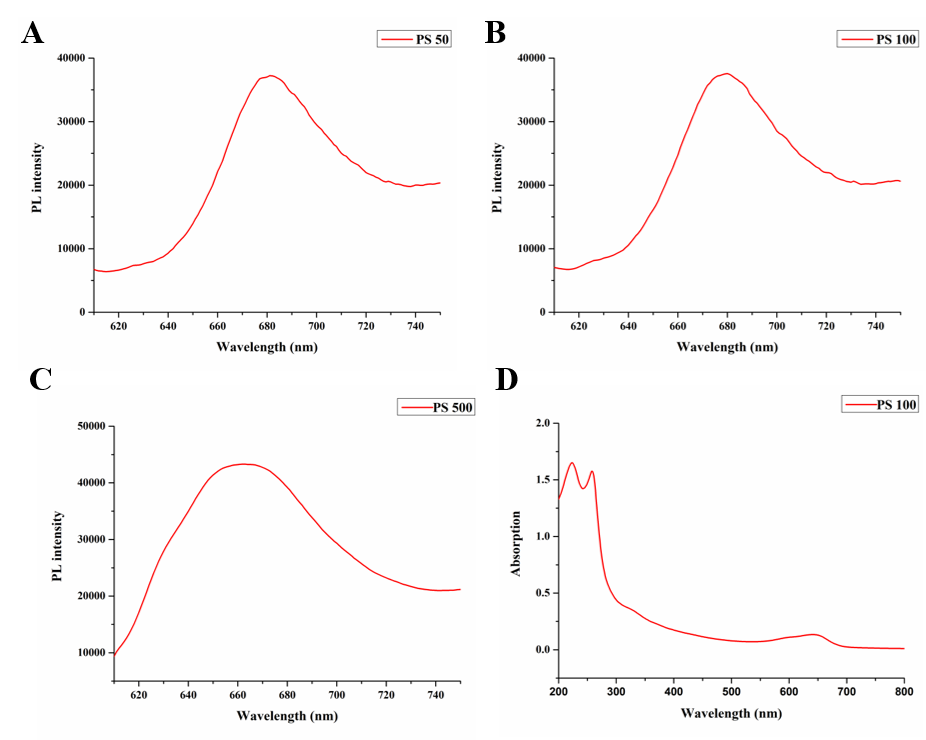


Figure S1. Fluorescence and UV-vis spectra of PS MPs/NPs. (A) The fluorescence spectra of PS50. (B) The fluorescence spectra of PS100. (C) The fluorescence spectra of PS500. (D) The UV-vis spectra of PS100.


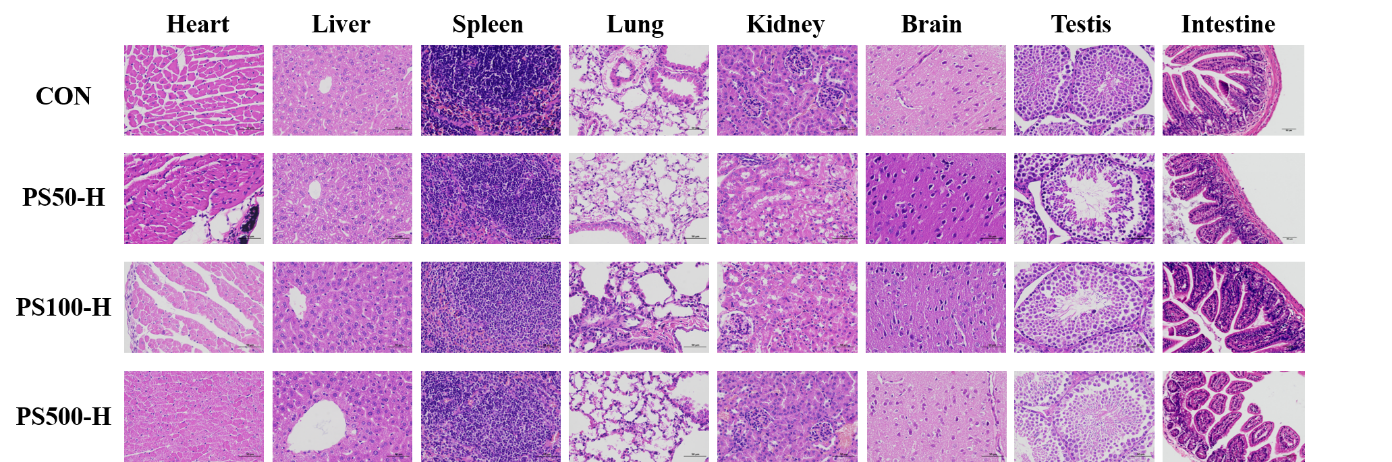


Figure S2. Representative histological images of major organs including heart, liver, spleen, lung, kidney, brain, testis and intestine tissues after treated with different sizes of PS MPs/NPs (40×, scale bar: 50 μm).
